# Supplementary material for: Development and Validation of a Primary Care Electronic Health Record Phenotype to Study Migration and Health in the UK
Source: Preprints.org preprint supplement (doi:10.20944/preprints202110.0081.v1), 2021-10-05
Supplement: Supplementary file 1 [file supplementary]

**Table S1. Code list to create 18 categories of ethnicity, and a 6-category higher level grouping of ethnicity**

| **6 level grouping** | **18 level grouping** | **Read code** | **Read term** | **Medcode** |
| --- | --- | --- | --- | --- |
| White British | White British | 9S10.00 | White British | 12446 |
| White British | White British | 9S13.00 | White Scottish | 26467 |
| White British | White British | 9S14.00 | Other white British ethnic group | 26310 |
| White British | White British | 9i00.00 | White British - ethnic category 2001 census | 98111 |
| White British | White British | 9i20.00 | English - ethnic category 2001 census | 12352 |
| White British | White British | 9i21.00 | Scottish - ethnic category 2001 census | 12436 |
| White British | White British | 9i22.00 | Welsh - ethnic category 2001 census | 12681 |
| White British | White British | 9i23.00 | Cornish - ethnic category 2001 census | 28887 |
| White Non-British | White Irish | 9S11.00 | White Irish | 24837 |
| White Non-British | White Irish | 9SA9.00 | Irish (NMO) | 24270 |
| White Non-British | White Irish | 9SI..00 | Irish traveller | 47601 |
| White Non-British | White Irish | 9i1..00 | Irish - ethnic category 2001 census | 12532 |
| White Non-British | White Irish | 9i10.00 | White Irish - ethnic category 2001 census | 98213 |
| White Non-British | White Irish | 9i24.00 | Northern Irish - ethnic category 2001 census | 42294 |
| White Non-British | White Irish | 9i2C.00 | Irish Traveller - ethnic category 2001 census | 55223 |
| White Non-British | White Other | 9S12.00 | Other white ethnic group | 12444 |
| White Non-British | White Other | 9SAA.00 | Greek/Greek Cypriot (NMO) | 45947 |
| White Non-British | White Other | 9SAA.11 | Greek (NMO) | 45955 |
| White Non-British | White Other | 9SAA.12 | Greek Cypriot (NMO) | 47949 |
| White Non-British | White Other | 9SAB.00 | Turkish/Turkish Cypriot (NMO) | 32066 |
| White Non-British | White Other | 9SAB.11 | Turkish (NMO) | 32126 |
| White Non-British | White Other | 9SAB.12 | Turkish Cypriot (NMO) | 32069 |
| White Non-British | White Other | 9SAC.00 | Other European (NMO) | 12633 |
| White Non-British | White Other | 9T1..00 | New Zealand ethnic groups | 45008 |
| White Non-British | White Other | 9T1Y.00 | Other New Zealand ethnic group | 96789 |
| White Non-British | White Other | 9T1Z.00 | New Zealand ethnic group NOS | 71425 |
| White Non-British | White Other | 9i2..00 | Other White background - ethnic category 2001 census | 12421 |
| White Non-British | White Other | 9i26.00 | Cypriot (part not stated) - ethnic category 2001 census | 32778 |
| White Non-British | White Other | 9i27.00 | Greek - ethnic category 2001 census | 12355 |
| White Non-British | White Other | 9i28.00 | Greek Cypriot - ethnic category 2001 census | 12769 |
| White Non-British | White Other | 9i29.00 | Turkish - ethnic category 2001 census | 12746 |
| White Non-British | White Other | 9i2A.00 | Turkish Cypriot - ethnic category 2001 census | 32413 |
| White Non-British | White Other | 9i2B.00 | Italian - ethnic category 2001 census | 12412 |
| White Non-British | White Other | 9i2D.00 | Traveller - ethnic category 2001 census | 55113 |
| White Non-British | White Other | 9i2E.00 | Gypsy/Romany - ethnic category 2001 census | 42290 |
| White Non-British | White Other | 9i2F.00 | Polish - ethnic category 2001 census | 12467 |
| White Non-British | White Other | 9i2G.00 | Baltic Estonian/Latvian/Lithuanian - ethn categ 2001 census | 12433 |
| White Non-British | White Other | 9i2H.00 | Commonwealth (Russian) Indep States - ethn categ 2001 census | 28973 |
| White Non-British | White Other | 9i2J.00 | Kosovan - ethnic category 2001 census | 26341 |
| White Non-British | White Other | 9i2K.00 | Albanian - ethnic category 2001 census | 25422 |
| White Non-British | White Other | 9i2L.00 | Bosnian - ethnic category 2001 census | 46956 |
| White Non-British | White Other | 9i2M.00 | Croatian - ethnic category 2001 census | 28866 |
| White Non-British | White Other | 9i2N.00 | Serbian - ethnic category 2001 census | 47074 |
| White Non-British | White Other | 9i2P.00 | Other republics former Yugoslavia - ethnic categ 2001 census | 28936 |
| White Non-British | White Other | 9i2T.00 | Other White or White unspecified ethnic category 2001 census | 12591 |
| White Non-British | White NOS | 9S1..00 | White | 22467 |
| White Non-British | White NOS | 9SB3.00 | Other ethnic, mixed white orig | 35459 |
| White Non-British | White NOS | 9i25.00 | Ulster Scots - ethnic category 2001 census | 40102 |
| White Non-British | White NOS | 9i2Q.00 | Mixed Irish and other White - ethnic category 2001 census | 26391 |
| White Non-British | White NOS | 9i2R.00 | Oth White European/European unsp/Mixed European 2001 census | 12402 |
| White Non-British | White NOS | 9i2S.00 | Other mixed White - ethnic category 2001 census | 28900 |
| Mixed | Mixed White and Black | 9SB5.00 | Black Caribbean and White | 32425 |
| Mixed | Mixed White and Black | 9SB6.00 | Black African and White | 32443 |
| Mixed | Mixed White and Black | 9i3..00 | White and Black Caribbean - ethnic category 2001 census | 12742 |
| Mixed | Mixed White and Black | 9i4..00 | White and Black African - ethnic category 2001 census | 12437 |
| Mixed | Mixed White and Asian | 9SB2.00 | Other ethnic, Asian/White orig | 32401 |
| Mixed | Mixed White and Asian | 9i5..00 | White and Asian - ethnic category 2001 census | 12638 |
| Mixed | Mixed Asian and Black | 9S45.00 | Black E Afric Asia/Indo-Caribb | 47965 |
| Mixed | Mixed Asian and Black | 9S45.11 | Black East African Asian | 57753 |
| Mixed | Mixed Asian and Black | 9S45.12 | Black Indo-Caribbean | 57763 |
| Mixed | Mixed Asian and Black | 9S46.00 | Black Indian sub-continent | 48005 |
| Mixed | Mixed Asian and Black | 9S47.00 | Black - other Asian | 35350 |
| Mixed | Mixed Asian and Black | 9S52.00 | Other Black - Black/Asian orig | 32165 |
| Mixed | Mixed Asian and Black | 9SA6.00 | E Afric Asian/Indo-Carib (NMO) | 38097 |
| Mixed | Mixed Asian and Black | 9i60.00 | Black and Asian - ethnic category 2001 census | 12795 |
| Mixed | Mixed Asian and Black | 9i61.00 | Black and Chinese - ethnic category 2001 census | 49940 |
| Mixed | Mixed Asian and Black | 9iA7.00 | Caribbean Asian - ethnic category 2001 census | 32399 |
| Mixed | Mixed Other | 9SB..00 | Other ethnic, mixed origin | 12696 |
| Mixed | Mixed Other | 9SB4.00 | Other ethnic, other mixed orig | 32420 |
| Mixed | Mixed Other | 9i6..00 | Other Mixed background - ethnic category 2001 census | 12873 |
| Mixed | Mixed Other | 9i63.00 | Chinese and White - ethnic category 2001 census | 12706 |
| Mixed | Mixed Other | 9i64.00 | Asian and Chinese - ethnic category 2001 census | 47005 |
| Mixed | Mixed Other | 9i65.00 | Other Mixed or Mixed unspecified ethnic category 2001 census | 32408 |
| Mixed | Mixed NOS | 9S51.00 | Other Black - Black/White orig | 25623 |
| Mixed | Mixed NOS | 9SB1.00 | Other ethnic, Black/White orig | 47401 |
| Mixed | Mixed NOS | 9i62.00 | Black and White - ethnic category 2001 census | 40110 |
| Asian/Asian British | Indian | 9S6..00 | Indian | 12482 |
| Asian/Asian British | Indian | 9SA7.00 | Indian sub-continent (NMO) | 39696 |
| Asian/Asian British | Indian | 9i7..00 | Indian or British Indian - ethnic category 2001 census | 12414 |
| Asian/Asian British | Indian | 9iA1.00 | Punjabi - ethnic category 2001 census | 26392 |
| Asian/Asian British | Pakistani | 9S7..00 | Pakistani | 24690 |
| Asian/Asian British | Pakistani | 9i8..00 | Pakistani or British Pakistani - ethnic category 2001 census | 12460 |
| Asian/Asian British | Pakistani | 9iA2.00 | Kashmiri - ethnic category 2001 census | 64133 |
| Asian/Asian British | Bangladeshi | 9S8..00 | Bangladeshi | 24740 |
| Asian/Asian British | Bangladeshi | 9i9..00 | Bangladeshi or British Bangladeshi - ethn categ 2001 census | 28888 |
| Asian/Asian British | Other Asian | 9SA6.11 | East African Asian (NMO) | 46818 |
| Asian/Asian British | Other Asian | 9SA8.00 | Other Asian (NMO) | 26379 |
| Asian/Asian British | Other Asian | 9SH..00 | Other Asian ethnic group | 12668 |
| Asian/Asian British | Other Asian | 9iA..00 | Other Asian background - ethnic category 2001 census | 12513 |
| Asian/Asian British | Other Asian | 9iA3.00 | East African Asian - ethnic category 2001 census | 47077 |
| Asian/Asian British | Other Asian | 9iA8.00 | British Asian - ethnic category 2001 census | 12653 |
| Asian/Asian British | Other Asian | 9iA9.00 | Mixed Asian - ethnic category 2001 census | 46056 |
| Asian/Asian British | Other Asian | 9iAA.00 | Other Asian or Asian unspecified ethnic category 2001 census | 28935 |
| Asian/Asian British | Other Asian | 9SA6.12 | Indo-Caribbean (NMO) | 99316 |
| Black/Black British | Black Caribbean | 9S2..00 | Black Caribbean | 12632 |
| Black/Black British | Black Caribbean | 9S42.00 | Black Caribbean/W.I./Guyana | 57435 |
| Black/Black British | Black Caribbean | 9S42.11 | Black Caribbean | 47950 |
| Black/Black British | Black Caribbean | 9S42.12 | Black West Indian | 47997 |
| Black/Black British | Black Caribbean | 9S42.13 | Black Guyana | 32100 |
| Black/Black British | Black Caribbean | 9SA3.00 | Caribbean I./W.I./Guyana (NMO) | 54593 |
| Black/Black British | Black Caribbean | 9SA3.11 | Caribbean Island (NMO) | 57094 |
| Black/Black British | Black Caribbean | 9SA3.12 | West Indian (NMO) | 57075 |
| Black/Black British | Black Caribbean | 9SA3.13 | Guyana (NMO) | 93144 |
| Black/Black British | Black Caribbean | 9iB..00 | Caribbean - ethnic category 2001 census | 12432 |
| Black/Black British | Black African | 9S3..00 | Black African | 12778 |
| Black/Black British | Black African | 9S44.00 | Black - other African country | 35412 |
| Black/Black British | Black African | 9SA5.00 | Other African countries (NMO) | 47969 |
| Black/Black British | Black African | 9iC..00 | African - ethnic category 2001 census | 12350 |
| Black/Black British | Black African | 9iD0.00 | Somali - ethnic category 2001 census | 12443 |
| Black/Black British | Black African | 9iD1.00 | Nigerian - ethnic category 2001 census | 32886 |
| Black/Black British | Black Other | 9S4..00 | Black, other, non-mixed origin | 24339 |
| Black/Black British | Black Other | 9S41.00 | Black British | 12452 |
| Black/Black British | Black Other | 9S43.00 | Black N African/Arab/Iranian | 41329 |
| Black/Black British | Black Other | 9S43.11 | Black North African | 46812 |
| Black/Black British | Black Other | 9S43.12 | Black Arab | 57752 |
| Black/Black British | Black Other | 9S43.13 | Black Iranian | 50286 |
| Black/Black British | Black Other | 9S48.00 | Black Black - other | 26312 |
| Black/Black British | Black Other | 9S5..00 | Black - other, mixed | 25676 |
| Black/Black British | Black Other | 9SG..00 | Other black ethnic group | 32136 |
| Black/Black British | Black Other | 9iD..00 | Other Black background - ethnic category 2001 census | 32389 |
| Black/Black British | Black Other | 9iD2.00 | Black British - ethnic category 2001 census | 40097 |
| Black/Black British | Black Other | 9iD3.00 | Mixed Black - ethnic category 2001 census | 40096 |
| Black/Black British | Black Other | 9iD4.00 | Other Black or Black unspecified ethnic category 2001 census | 46047 |
| Other | Chinese | 9S9..00 | Chinese | 24272 |
| Other | Chinese | 9iE..00 | Chinese - ethnic category 2001 census | 12468 |
| Other | Other ethnic group | 9SA..00 | Other ethnic non-mixed (NMO) | 30280 |
| Other | Other ethnic group | 9SA1.00 | Brit. ethnic minor. spec.(NMO) | 32110 |
| Other | Other ethnic group | 9SA2.00 | Brit. ethnic minor. unsp (NMO) | 57764 |
| Other | Other ethnic group | 9SA4.00 | N African Arab/Iranian (NMO) | 24962 |
| Other | Other ethnic group | 9SA4.11 | North African Arab (NMO) | 47285 |
| Other | Other ethnic group | 9SA4.12 | Iranian (NMO) | 25082 |
| Other | Other ethnic group | 9SAD.00 | Other ethnic NEC (NMO) | 41214 |
| Other | Other ethnic group | 9SC..00 | Vietnamese | 25411 |
| Other | Other ethnic group | 9SJ..00 | Other ethnic group | 12757 |
| Other | Other ethnic group | 9T1A.00 | Other Pacific ethnic group | 46752 |
| Other | Other ethnic group | 9iA4.00 | Sri Lankan - ethnic category 2001 census | 12608 |
| Other | Other ethnic group | 9iA5.00 | Tamil - ethnic category 2001 census | 12760 |
| Other | Other ethnic group | 9iA6.00 | Sinhalese - ethnic category 2001 census | 12887 |
| Other | Other ethnic group | 9iF..00 | Other - ethnic category 2001 census | 12434 |
| Other | Other ethnic group | 9iF0.00 | Vietnamese - ethnic category 2001 census | 12719 |
| Other | Other ethnic group | 9iF1.00 | Japanese - ethnic category 2001 census | 12473 |
| Other | Other ethnic group | 9iF2.00 | Filipino - ethnic category 2001 census | 12420 |
| Other | Other ethnic group | 9iF3.00 | Malaysian - ethnic category 2001 census | 12730 |
| Other | Other ethnic group | 9iF4.00 | Buddhist - ethnic category 2001 census | 63872 |
| Other | Other ethnic group | 9iF5.00 | Hindu - ethnic category 2001 census | 56127 |
| Other | Other ethnic group | 9iF6.00 | Jewish - ethnic category 2001 census | 46063 |
| Other | Other ethnic group | 9iF7.00 | Muslim - ethnic category 2001 census | 47091 |
| Other | Other ethnic group | 9iF8.00 | Sikh - ethnic category 2001 census | 49658 |
| Other | Other ethnic group | 9iF9.00 | Arab - ethnic category 2001 census | 46059 |
| Other | Other ethnic group | 9iFA.00 | North African - ethnic category 2001 census | 47028 |
| Other | Other ethnic group | 9iFB.00 | Mid East (excl Israeli, Iranian & Arab) - eth cat 2001 cens | 28909 |
| Other | Other ethnic group | 9iFC.00 | Israeli - ethnic category 2001 census | 46964 |
| Other | Other ethnic group | 9iFD.00 | Iranian - ethnic category 2001 census | 25937 |
| Other | Other ethnic group | 9iFE.00 | Kurdish - ethnic category 2001 census | 45964 |
| Other | Other ethnic group | 9iFF.00 | Moroccan - ethnic category 2001 census | 25451 |
| Other | Other ethnic group | 9iFG.00 | Latin American - ethnic category 2001 census | 26246 |
| Other | Other ethnic group | 9iFH.00 | South and Central American - ethnic category 2001 census | 12756 |
| Other | Other ethnic group | 9iFJ.00 | Mauritian/Seychellois/Maldivian/St Helena eth cat 2001census | 32382 |
| Other | Other ethnic group | 9iFK.00 | Any other group - ethnic category 2001 census | 26455 |
| N/A | Ethnic group not specified | 916E.00 | Patient ethnicity unknown | 93749 |
| N/A | Ethnic group not specified | 9S...00 | Ethnic groups (1991 census) | 10196 |
| N/A | Ethnic group not specified | 9SD..00 | Ethnic group not given - patient refused | 12429 |
| N/A | Ethnic group not specified | 9SE..00 | Ethnic group not recorded | 24340 |
| N/A | Ethnic group not specified | 9SZ..00 | Ethnic groups (census) NOS | 45199 |
| N/A | Ethnic group not specified | 9T...00 | Ethnicity and other related nationality data | 23955 |
| N/A | Ethnic group not specified | 9i...00 | Ethnic category - 2001 census | 12435 |
| N/A | Ethnic group not specified | 9i0..00 | British or mixed British - ethnic category 2001 census | 12351 |
| N/A | Ethnic group not specified | 9iG..00 | Ethnic category not stated - 2001 census | 12459 |

# Table S2. Migration phenotype, including Read (V2) codes, Read terms, Medcodes, type of code and level of certainty of migration status

####

| **Level of certainty of migration status** | **Type of code** | **Read code** | **Read term** | **Medcode** |
| --- | --- | --- | --- | --- |
|  |  |  |  |  |
| Definite | Born outside of the UK | 13e..00 | Country of birth (Asian) | 11552 |
| Definite | Born outside of the UK | 13gf.00 | Born in South Africa | 12458 |
| Definite | Born outside of the UK | 13eG.00 | Born in Iraq | 12713 |
| Definite | Born outside of the UK | 13eH.00 | Born in Israel | 25007 |
| Definite | Born outside of the UK | 13go.00 | Born in Zimbabwe | 25008 |
| Definite | Born outside of the UK | 13eY.00 | Born in Philippines | 25092 |
| Definite | Born outside of the UK | 13gi.00 | Born in Tanzania | 25133 |
| Definite | Born outside of the UK | 13dl.00 | Born in Yugoslavia | 25256 |
| Definite | Born outside of the UK | 13gC.00 | Born in Congo | 25664 |
| Definite | Born outside of the UK | 13dM.00 | Born in Kosovo | 25730 |
| Definite | Born outside of the UK | 13eW.00 | Born in Pakistan | 25995 |
| Definite | Born outside of the UK | 13eo.00 | Born in Vietnam | 26334 |
| Definite | Born outside of the UK | 13eF.00 | Born in Iran | 26426 |
| Definite | Born outside of the UK | 13dA.00 | Born in Czech Republic | 26463 |
| Definite | Born outside of the UK | 13dP.00 | Born in Lithuania | 28301 |
| Definite | Born outside of the UK | 13eg.00 | Born in Syria | 28529 |
| Definite | Born outside of the UK | 13gY.00 | Born in Niger | 30224 |
| Definite | Born outside of the UK | 13f5.00 | Born in Canada | 30606 |
| Definite | Born outside of the UK | 13f..00 | Country of birth (American) | 32053 |
| Definite | Born outside of the UK | 13d0.00 | Born in Albania | 32055 |
| Definite | Born outside of the UK | 13e8.00 | Born in China | 32058 |
| Definite | Born outside of the UK | 13e0.00 | Born in Afghanistan | 32060 |
| Definite | Born outside of the UK | 13h0.00 | Born in Australia | 32061 |
| Definite | Born outside of the UK | 13jC.00 | Born in Trinidad and Tobago | 32062 |
| Definite | Born outside of the UK | 13gJ.00 | Born in Ghana | 32067 |
| Definite | Born outside of the UK | 13gl.00 | Born in Uganda | 32068 |
| Definite | Born outside of the UK | 13eI.00 | Born in Japan | 32070 |
| Definite | Born outside of the UK | 13fL.00 | Born in USA | 32072 |
| Definite | Born outside of the UK | 13h1.00 | Born in New Zealand | 32074 |
| Definite | Born outside of the UK | 13f3.00 | Born in Brazil | 32075 |
| Definite | Born outside of the UK | 13j6.00 | Born in Jamaica | 32076 |
| Definite | Born outside of the UK | 13g0.00 | Born in Algeria | 32079 |
| Definite | Born outside of the UK | 13dH.00 | Born in Greece | 32080 |
| Definite | Born outside of the UK | 13dF.00 | Born in France | 32081 |
| Definite | Born outside of the UK | 13eD.00 | Born in India | 32082 |
| Definite | Born outside of the UK | 13dG.00 | Born in Germany | 32085 |
| Definite | Born outside of the UK | 13j2.00 | Born in Barbados | 32089 |
| Definite | Born outside of the UK | 13fN.00 | Born in Venezuela | 32090 |
| Definite | Born outside of the UK | 13dW.00 | Born in Poland | 32094 |
| Definite | Born outside of the UK | 13de.00 | Born in Spain | 32097 |
| Definite | Born outside of the UK | 13df.00 | Born in Sweden | 32098 |
| Definite | Born outside of the UK | 13gM.00 | Born in Ivory Coast | 32099 |
| Definite | Born outside of the UK | 13g..00 | Country of birth (African) | 32102 |
| Definite | Born outside of the UK | 13di.00 | Born in Ukraine | 32103 |
| Definite | Born outside of the UK | 13gV.00 | Born in Morocco | 32108 |
| Definite | Born outside of the UK | 13gZ.00 | Born in Nigeria | 32111 |
| Definite | Born outside of the UK | 13gN.00 | Born in Kenya | 32112 |
| Definite | Born outside of the UK | 13dK.00 | Born in Ireland | 32113 |
| Definite | Born outside of the UK | 13ek.00 | Born in Turkey | 32114 |
| Definite | Born outside of the UK | 13gS.00 | Born in Malawi | 32115 |
| Definite | Born outside of the UK | 13dL.00 | Born in Italy | 32116 |
| Definite | Born outside of the UK | 13dc.00 | Born in Slovakia | 32119 |
| Definite | Born outside of the UK | 13fB.00 | Born in Grenada | 32120 |
| Definite | Born outside of the UK | 13e3.00 | Born in Bangladesh | 32125 |
| Definite | Born outside of the UK | 13eb.00 | Born in Russia | 32127 |
| Definite | Born outside of the UK | 13eM.00 | Born in Kyrgyzstan | 32128 |
| Definite | Born outside of the UK | 13j9.00 | Born in St. Lucia | 32131 |
| Definite | Born outside of the UK | 13ej.00 | Born in Thailand | 32135 |
| Definite | Born outside of the UK | 13dD.00 | Born in Estonia | 32139 |
| Definite | Born outside of the UK | 13gU.00 | Born in Mauritius | 32140 |
| Definite | Born outside of the UK | 13ec.00 | Born in Saudi Arabia | 32144 |
| Definite | Born outside of the UK | 13dh.00 | Born in The Netherlands | 32150 |
| Definite | Born outside of the UK | 13ed.00 | Born in Singapore | 32157 |
| Definite | Born outside of the UK | 13gG.00 | Born in Ethiopia | 32158 |
| Definite | Born outside of the UK | 13dX.00 | Born in Portugal | 32160 |
| Definite | Born outside of the UK | 13gW.00 | Born in Mozambique | 32162 |
| Definite | Born outside of the UK | 13fJ.00 | Born in Peru | 32166 |
| Definite | Born outside of the UK | 13g5.00 | Born in Burundi | 32167 |
| Definite | Born outside of the UK | 13gn.00 | Born in Zambia | 32168 |
| Definite | Born outside of the UK | 13d7.00 | Born in Bulgaria | 32169 |
| Definite | Born outside of the UK | 13eP.00 | Born in Malaysia | 32171 |
| Definite | Born outside of the UK | 13dE.00 | Born in Finland | 32173 |
| Definite | Born outside of the UK | 13dB.00 | Born in Denmark | 32186 |
| Definite | Born outside of the UK | 13ge.00 | Born in Somalia | 32189 |
| Definite | Born outside of the UK | 13d9.00 | Born in Cyprus | 32190 |
| Definite | Born outside of the UK | 13gd.00 | Born in Sierra Leone | 32197 |
| Definite | Born outside of the UK | 13fF.00 | Born in Mexico | 32201 |
| Definite | Born outside of the UK | 13e7.00 | Born in Chechnya | 32202 |
| Definite | Born outside of the UK | 13gI.00 | Born in Gambia | 32207 |
| Definite | Born outside of the UK | 13eT.00 | Born in Nepal | 32217 |
| Definite | Born outside of the UK | 13eC.00 | Born in Hong Kong | 32220 |
| Definite | Born outside of the UK | 13gX.00 | Born in Namibia | 32233 |
| Definite | Born outside of the UK | 13gP.00 | Born in Liberia | 32237 |
| Definite | Born outside of the UK | 13dN.00 | Born in Latvia | 32242 |
| Definite | Born outside of the UK | 13ef.00 | Born in Sri Lanka | 32245 |
| Definite | Born outside of the UK | 13e6.00 | Born in Burma | 32254 |
| Definite | Born outside of the UK | 13g7.00 | Born in Cameroon | 32255 |
| Definite | Born outside of the UK | 13g1.00 | Born in Angola | 32260 |
| Definite | Born outside of the UK | 13e2.00 | Born in Bahrain | 32273 |
| Definite | Born outside of the UK | 13k4.00 | Born in Seychelles | 32293 |
| Definite | Born outside of the UK | 13j0.00 | Born in Antigua and Barbuda | 32301 |
| Definite | Born outside of the UK | 13f7.00 | Born in Columbia | 32303 |
| Definite | Born outside of the UK | 13jB.00 | Born in Togo | 32304 |
| Definite | Born outside of the UK | 13gc.00 | Born in Senegal | 32309 |
| Definite | Born outside of the UK | 13f9.00 | Born in Ecuador | 32311 |
| Definite | Born outside of the UK | 13d2.00 | Born in Austria | 32313 |
| Definite | Born outside of the UK | 13f0.00 | Born in Argentina | 32325 |
| Definite | Born outside of the UK | 13ga.00 | Born in Rwanda | 32331 |
| Definite | Born outside of the UK | 13gE.00 | Born in Egypt | 32333 |
| Definite | Born outside of the UK | 13f4.00 | Born in British Guyana | 32342 |
| Definite | Born outside of the UK | 13dZ.00 | Born in Romania | 32345 |
| Definite | Born outside of the UK | 13gL.00 | Born in Guinea Republic | 32347 |
| Definite | Born outside of the UK | 13d4.00 | Born in Belgium | 32352 |
| Definite | Born outside of the UK | 13e1.00 | Born in Armenia | 32361 |
| Definite | Born outside of the UK | 13j4.00 | Born in Dominican Republic | 32369 |
| Definite | Born outside of the UK | 13eh.00 | Born in Taiwan | 32390 |
| Definite | Born outside of the UK | 13d6.00 | Born in Bosnia - Herzegovnia | 32397 |
| Definite | Born outside of the UK | 13k..00 | Country of birth (Pacific) | 32417 |
| Definite | Born outside of the UK | 13dI.00 | Born in Hungary | 32688 |
| Definite | Born outside of the UK | 13gk.00 | Born in Tunisia | 32741 |
| Definite | Born outside of the UK | 13dg.00 | Born in Switzerland | 32807 |
| Definite | Born outside of the UK | 13gg.00 | Born in Sudan | 36794 |
| Definite | Born outside of the UK | 13gR.00 | Born in Madagascar | 37197 |
| Definite | Born outside of the UK | 13fD.00 | Born in Guyana | 38075 |
| Definite | Born outside of the UK | 13gA.00 | Born in Chad | 38117 |
| Definite | Born outside of the UK | 13dS.00 | Born in Moldavia | 39974 |
| Definite | Born outside of the UK | 13gm.00 | Born in Zaire | 41209 |
| Definite | Born outside of the UK | 13d8.00 | Born in Croatia | 41210 |
| Definite | Born outside of the UK | 13eO.00 | Born in Lebanon | 41211 |
| Definite | Born outside of the UK | 13dV.00 | Born in Norway | 41213 |
| Definite | Born outside of the UK | 13eL.00 | Born in Kuwait | 41217 |
| Definite | Born outside of the UK | 13ee.00 | Born in South Korea | 41228 |
| Definite | Born outside of the UK | 13f2.00 | Born in Bolivia | 41230 |
| Definite | Born outside of the UK | 13d5.00 | Born in Belorussia | 41233 |
| Definite | Born outside of the UK | 13fE.00 | Born in Honduras | 41280 |
| Definite | Born outside of the UK | 13eE.00 | Born in Indonesia | 41289 |
| Definite | Born outside of the UK | 13j3.00 | Born in Cuba | 41290 |
| Definite | Born outside of the UK | 13f6.00 | Born in Chile | 41291 |
| Definite | Born outside of the UK | 13eK.00 | Born in Kazakhstan | 41292 |
| Definite | Born outside of the UK | 13eX.00 | Born in Palestine | 41297 |
| Definite | Born outside of the UK | 13el.00 | Born in Turkmenistan | 41302 |
| Definite | Born outside of the UK | 13dd.00 | Born in Slovenia | 41304 |
| Definite | Born outside of the UK | 13eJ.00 | Born in Jordan | 41311 |
| Definite | Born outside of the UK | 13dJ.00 | Born in Iceland | 41312 |
| Definite | Born outside of the UK | 13g3.00 | Born in Botswana | 41316 |
| Definite | Born outside of the UK | 13g2.00 | Born in Benin | 41318 |
| Definite | Born outside of the UK | 13h..00 | Country of birth (Australasian) | 41327 |
| Definite | Born outside of the UK | 13d3.00 | Born in Azerbaijan | 41337 |
| Definite | Born outside of the UK | 13gQ.00 | Born in Libya | 41341 |
| Definite | Born outside of the UK | 13ep.00 | Born in Yemen | 41344 |
| Definite | Born outside of the UK | 13gh.00 | Born in Swaziland | 41350 |
| Definite | Born outside of the UK | 13eS.00 | Born in Mongolia | 41351 |
| Definite | Born outside of the UK | 13e9.00 | Born in Democratic People's Republic of Korea | 41354 |
| Definite | Born outside of the UK | 13ea.00 | Born in Republic of Korea | 41356 |
| Definite | Born outside of the UK | 13dY.00 | Born in Republic of Ireland | 41357 |
| Definite | Born outside of the UK | 13dR.00 | Born in Malta | 41364 |
| Definite | Born outside of the UK | 13gK.00 | Born in Guinea Bissau | 41365 |
| Definite | Born outside of the UK | 13fM.00 | Born in Uruguay | 41367 |
| Definite | Born outside of the UK | 13em.00 | Born in United Arab Emirates | 41372 |
| Definite | Born outside of the UK | 13fI.00 | Born in Paraguay | 41399 |
| Definite | Born outside of the UK | 13en.00 | Born in Uzbekistan | 41402 |
| Definite | Born outside of the UK | 13k0.00 | Born in Fiji | 42635 |
| Definite | Born outside of the UK | 13eZ.00 | Born in Qatar | 42639 |
| Definite | Born outside of the UK | 13k6.00 | Born in Tonga | 47559 |
| Definite | Born outside of the UK | 13k5.00 | Born in Solomon Islands | 48297 |
| Definite | Born outside of the UK | 13eB.00 | Born in Georgia | 49402 |
| Definite | Born outside of the UK | 13j..00 | Country of birth (Atlantic) | 49907 |
| Definite | Born outside of the UK | 13eV.00 | Born in Oman | 51778 |
| Definite | Born outside of the UK | 13eA.00 | Born in East Timor | 57186 |
| Definite | Born outside of the UK | 13k7.00 | Born in Tuvalu | 57189 |
| Definite | Born outside of the UK | 13j5.00 | Born in Haiti | 58192 |
| Definite | Born outside of the UK | 13g4.00 | Born in Burkina Faso | 58527 |
| Definite | Born outside of the UK | 13j1.00 | Born in Bahamas | 58533 |
| Definite | Born outside of the UK | 13gH.00 | Born in Gabon | 59657 |
| Definite | Born outside of the UK | 13e5.00 | Born in Brunei | 62298 |
| Definite | Born outside of the UK | 13fH.00 | Born in Panama | 63923 |
| Definite | Born outside of the UK | 13gj.00 | Born in The Gambia | 63927 |
| Definite | Born outside of the UK | 13fA.00 | Born in El Salvador | 63943 |
| Definite | Born outside of the UK | 13k3.00 | Born in Papua New Guinea | 64120 |
| Definite | Born outside of the UK | 13gp.00 | Born in Eritrea | 64949 |
| Definite | Born outside of the UK | 13f8.00 | Born in Costa Rica | 64984 |
| Definite | Born outside of the UK | 13eR.00 | Born in Mali | 65310 |
| Definite | Born outside of the UK | 13jA.00 | Born in St. Vincent | 66551 |
| Definite | Born outside of the UK | 13j8.00 | Born in St. Kitts and Nevis | 66553 |
| Definite | Born outside of the UK | 13eU.00 | Born in North Korea | 66560 |
| Definite | Born outside of the UK | 13gD.00 | Born in Djibouti | 68866 |
| Definite | Born outside of the UK | 13dQ.00 | Born in Luxembourg | 69131 |
| Definite | Born outside of the UK | 13j7.00 | Born in Puerto Rico | 69135 |
| Definite | Born outside of the UK | 13gT.00 | Born in Mauritania | 69143 |
| Definite | Born outside of the UK | 13fK.00 | Born in Suriname | 69426 |
| Definite | Born outside of the UK | 13eN.00 | Born in Laos | 69431 |
| Definite | Born outside of the UK | 13g8.00 | Born in Cape Verde Islands | 69560 |
| Definite | Born outside of the UK | 13fC.00 | Born in Guatemala | 69806 |
| Definite | Born outside of the UK | 13dT.00 | Born in Monaco | 71190 |
| Definite | Born outside of the UK | 13fG.00 | Born in Nicaragua | 74892 |
| Definite | Born outside of the UK | 13eQ.00 | Born in Maldives | 91328 |
| Definite | Born outside of the UK | 13gO.00 | Born in Lesotho | 93697 |
| Definite | Born outside of the UK | 13gF.00 | Born in Equatorial Guinea | 93923 |
| Definite | Born outside of the UK | 13d1.00 | Born in Andorra | 93935 |
| Definite | Born outside of the UK | 13f1.00 | Born in Belize | 94050 |
| Definite | Born outside of the UK | 13dO.00 | Born in Liechtenstein | 95708 |
| Definite | Born outside of the UK | 13t..00 | Born in British overseas territory | 96295 |
| Definite | Born outside of the UK | 13g6.00 | Born in Cambodia | 96636 |
| Definite | Born outside of the UK | 13dm.00 | Born in former Yugoslav Republic of Macedonia | 96824 |
| Definite | Born outside of the UK | 13e4.00 | Born in Bhutan | 97390 |
| Definite | Born outside of the UK | 13t1.00 | Born in Bermuda | 98038 |
| Definite | Born outside of the UK | 13da.00 | Born in San Marino | 98530 |
| Definite | Born outside of the UK | 13dj.00 | Born in Vatican City | 99119 |
| Definite | Born outside of the UK | 13g9.00 | Born in Central African Republic | 99258 |
| Definite | Born outside of the UK | 13jD.00 | Born in Dominica | 99431 |
| Definite | Born outside of the UK | 13ei.00 | Born in Tajikistan | 100007 |
| Definite | Born outside of the UK | 13dn.00 | Born in Serbia | 100517 |
| Definite | Born outside of the UK | 13gB.00 | Born in Comoros Islands | 101158 |
| Definite | Born outside of the UK | 13gb.00 | Born in Sao Tome and Principe | 101591 |
| Definite | Born outside of the UK | 13Zq.00 | Country of birth unknown | 101846 |
| Definite | Born outside of the UK | 13v0.00 | Born in Martinique | 103364 |
| Definite | Born outside of the UK | 13k9.00 | Born in Western Samoa | 103965 |
| Definite | Born outside of the UK | 13t2.00 | Born in Anguilla | 104983 |
| Definite | Born outside of the UK | 13t0.00 | Born in Montserrat | 105923 |
| Definite | Born outside of the UK | 13jE.00 | Born in Aruba | 108271 |
| Definite | Born outside of the UK | 13v7.00 | Born in Guadeloupe | 108936 |
| Definite | Born outside of the UK | 13eq.00 | Born in Christmas Island | 109226 |
| Definite | Born outside of the UK | 13dq.00 | Born in Republic of Moldova | 109260 |
| Definite | Born outside of the UK | 13t5.00 | Born in Saint Helena, Ascension and Tristan da Cunha | 109276 |
| Definite | Born outside of the UK | 13do.00 | Born in Montenegro | 109457 |
| Definite | Born outside of the UK | 13jG.00 | Born in Saint Vincent and the Grenadines | 109458 |
| Definite | Born outside of the UK | 13t3.00 | Born in British Virgin Islands | 109727 |
| Definite | Born outside of the UK | 13kB.00 | Born in American Samoa | 109791 |
| Definite | Born outside of the UK | 13dp.00 | Born in Belarus | 109898 |
| Definite | Born outside of the UK | 13gq.00 | Born in Democratic Republic of Congo | 109992 |
| Definite | Born outside of the UK | 13v4.00 | Born in French Guiana | 111051 |
| Definite | Born outside of the UK | 13k8.00 | Born in Vanuatu | 111392 |
| Definite | Born outside of the UK | 13jH.00 | Born in Sint Maarten | 111700 |
| Definite | Born outside of the UK | 13dx.00 | Born in Aland Islands | 111774 |
| Definite | Born outside of the UK | 13t9.00 | Born in Cayman Islands | 112269 |
| Definite | Visa status indicating migration | 13ZC.00 | Immigrant | 4114 |
| Definite | Visa status indicating migration | ZV70314 | [V]Immigration medical | 8929 |
| Definite | Visa status indicating migration | 133L.00 | Immigrant | 9292 |
| Definite | Visa status indicating migration | 13ZN.00 | Asylum seeker | 9627 |
| Definite | Visa status indicating migration | 13D3.00 | Social migrant | 23398 |
| Definite | Visa status indicating migration | 13ZB.00 | Refugee | 24403 |
| Definite | Visa status indicating migration | ZV70516 | [V]Refugee health examination | 25632 |
| Definite | Visa status indicating migration | 13D4.00 | Illegal migrant | 44407 |
| Definite | Visa status indicating migration | 133Q.00 | Family reunion immigrant | 47073 |
| Definite | Visa status indicating migration | 912H.00 | Overseas visitor | 47513 |
| Definite | Visa status indicating migration | 6951 | Immigration examination | 48029 |
| Definite | Visa status indicating migration | 69D8.00 | Exam. of refugee | 65503 |
| Definite | Visa status indicating migration | 13Zd.00 | Failed asylum seeker | 94906 |
| Definite | Visa status indicating migration | 13Zw.00 | Has United Kingdom student visa | 104123 |
| Definite | Visa status indicating migration | 918z.00 | Has United Kingdom general visitor visa | 107572 |
| Probable | First/main language not English | 13lZ.00 | Main spoken language Turkish | 22294 |
| Probable | First/main language not English | 041E.11 | Language interpreter | 22515 |
| Probable | First/main language not English | 13Z6000 | English as a second language | 23523 |
| Probable | First/main language not English | 13Z6500 | Language Punjabi | 24295 |
| Probable | First/main language not English | 13Z6300 | Language Hindi | 24296 |
| Probable | First/main language not English | 13Z6600 | Language Urdu | 24691 |
| Probable | First/main language not English | 13Z6200 | Language Gujurati | 24712 |
| Probable | First/main language not English | 13Z6100 | Language Bengali | 24741 |
| Probable | First/main language not English | 13lC.00 | Main spoken language Polish | 24881 |
| Probable | First/main language not English | 13b0.00 | Vietnamese language | 25410 |
| Probable | First/main language not English | 13lS.00 | Main spoken language Albanian | 25423 |
| Probable | First/main language not English | 13l2.00 | Main spoken language Cantonese | 25472 |
| Probable | First/main language not English | 13lx.00 | Main spoken language Thai | 25609 |
| Probable | First/main language not English | 13lp.00 | Main spoken language Malayalam | 25616 |
| Probable | First/main language not English | 13l5.00 | Main spoken language French | 25665 |
| Probable | First/main language not English | 13l1.00 | Main spoken language Bengali | 25802 |
| Probable | First/main language not English | 13lE.00 | Main spoken language Punjabi | 25829 |
| Probable | First/main language not English | 13lP.00 | Main spoken language Shona | 26078 |
| Probable | First/main language not English | 13Z6400 | Language Pashtu | 26196 |
| Probable | First/main language not English | 13lH.00 | Main spoken language Spanish | 26247 |
| Probable | First/main language not English | 13lb.00 | Main spoken language Vietnamese | 26335 |
| Probable | First/main language not English | 13l0.00 | Main spoken language Arabic | 26337 |
| Probable | First/main language not English | 13lL.00 | Main spoken language Urdu | 26361 |
| Probable | First/main language not English | 13l3.00 | Main spoken language Czech | 26464 |
| Probable | First/main language not English | 13lF.00 | Main spoken language Russian | 32427 |
| Probable | First/main language not English | 13lG.00 | Main spoken language Somali | 32456 |
| Probable | First/main language not English | 13lB.00 | Main spoken language Mandarin | 32776 |
| Probable | First/main language not English | 13lW.00 | Main spoken language Japanese | 36852 |
| Probable | First/main language not English | 13lt.00 | Main spoken language Serbian | 36862 |
| Probable | First/main language not English | 13lQ.00 | Main spoken language Italian | 36980 |
| Probable | First/main language not English | 13lN.00 | Main spoken language Kurdish | 46014 |
| Probable | First/main language not English | 13l8.00 | Main spoken language Hindi | 46029 |
| Probable | First/main language not English | 13lY.00 | Main spoken language Lithuanian | 46325 |
| Probable | First/main language not English | 13lK.00 | Main spoken language Tamil | 46861 |
| Probable | First/main language not English | 13lV.00 | Main spoken language Greek | 46974 |
| Probable | First/main language not English | 13li.00 | Main spoken language French Creole | 47007 |
| Probable | First/main language not English | 13lO.00 | Main spoken language Farsi | 47029 |
| Probable | First/main language not English | 13lJ.00 | Main spoken language Sylheti | 47627 |
| Probable | First/main language not English | 13ld.00 | Main spoken language Amharic | 47628 |
| Probable | First/main language not English | 13lR.00 | Main spoken language German | 47630 |
| Probable | First/main language not English | 13lw.00 | Main spoken language Tagalog | 47631 |
| Probable | First/main language not English | 13lI.00 | Main spoken language Swahili | 47641 |
| Probable | First/main language not English | 13lu.00 | Main spoken language Sinhala | 47643 |
| Probable | First/main language not English | 13lm.00 | Main spoken language Igbo | 47646 |
| Probable | First/main language not English | 13l6.00 | Main spoken language Gujerati | 48002 |
| Probable | First/main language not English | 13b4.00 | Mirpuri language | 52200 |
| Probable | First/main language not English | 13lM.00 | Main spoken language Yoruba | 54409 |
| Probable | First/main language not English | 13lT.00 | Main spoken language Croatian | 54410 |
| Probable | First/main language not English | 13lc.00 | Main spoken language Akan | 54413 |
| Probable | First/main language not English | 13lf.00 | Main spoken language Dutch | 54414 |
| Probable | First/main language not English | 13lX.00 | Main spoken language Korean | 54415 |
| Probable | First/main language not English | 13l9.00 | Main spoken language Iba | 54416 |
| Probable | First/main language not English | 13lv.00 | Main spoken language Swedish | 54417 |
| Probable | First/main language not English | 13lh.00 | Main spoken language Flemish | 56879 |
| Probable | First/main language not English | 13b3.00 | Creole language | 57462 |
| Probable | First/main language not English | 13ll.00 | Main spoken language Hebrew | 57755 |
| Probable | First/main language not English | 13lq.00 | Main spoken language Norwegian | 57758 |
| Probable | First/main language not English | 13l7.00 | Main spoken language Hausa | 58193 |
| Probable | First/main language not English | 13lr.00 | Main spoken language Pashto | 58643 |
| Probable | First/main language not English | 13sA.00 | English as a second language | 63932 |
| Probable | First/main language not English | 13ls.00 | Main spoken language Patois | 64948 |
| Probable | First/main language not English | 13la.00 | Main spoken language Ukrainian | 66685 |
| Probable | First/main language not English | 13lg.00 | Main spoken language Ethiopian | 69139 |
| Probable | First/main language not English | 13lo.00 | Main spoken language Luganda | 69153 |
| Probable | First/main language not English | 13lA.00 | Main spoken language Kutchi | 72379 |
| Probable | First/main language not English | 13lk.00 | Main spoken language Hakka | 91422 |
| Probable | First/main language not English | ZV60012 | [V]Social migrant | 93643 |
| Probable | First/main language not English | 13u0.00 | Main spoken language Bulgarian | 95897 |
| Probable | First/main language not English | 13ur.00 | Main spoken language Latvian | 95940 |
| Probable | First/main language not English | 13lT.11 | Main spoken language Serbo-Croatian | 95968 |
| Probable | First/main language not English | 13lt.11 | Main spoken language Serbo-Croatian | 95969 |
| Probable | First/main language not English | 13lO.11 | Main spoken language Persian | 95970 |
| Probable | First/main language not English | 13lu.11 | Main spoken language Sinhalese | 95974 |
| Probable | First/main language not English | 13w1.00 | Main spoken language Nepali | 95978 |
| Probable | First/main language not English | 13ua.00 | Main spoken language Hungarian | 96041 |
| Probable | First/main language not English | 13lE.11 | Main spoken language Panjabi | 96147 |
| Probable | First/main language not English | 13u5.00 | Main spoken language Afrikaans | 96148 |
| Probable | First/main language not English | 13u1.00 | Main spoken language Romanian | 96152 |
| Probable | First/main language not English | 13wL.00 | Main spoken language Telugu | 96163 |
| Probable | First/main language not English | 13wR.00 | Main spoken language Twi | 96223 |
| Probable | First/main language not English | 13wG.00 | Main spoken language Slovenian | 96230 |
| Probable | First/main language not English | 13wD.00 | Main spoken language Sindhi | 96240 |
| Probable | First/main language not English | 13ux.00 | Main spoken language Marathi | 96267 |
| Probable | First/main language not English | 13uj.00 | Main spoken language Kannada | 96268 |
| Probable | First/main language not English | 13uN.00 | Main spoken language Danish | 96289 |
| Probable | First/main language not English | 13u6.00 | Main spoken language Armenian | 96290 |
| Probable | First/main language not English | 13w5.00 | Main spoken language Quechua | 96317 |
| Probable | First/main language not English | 13uv.00 | Main spoken language Maltese | 96370 |
| Probable | First/main language not English | 13uu.00 | Main spoken language Malay | 96376 |
| Probable | First/main language not English | 13le.00 | Main spoken language Brawa | 96485 |
| Probable | First/main language not English | 13wM.00 | Main spoken language Tibetan | 96558 |
| Probable | First/main language not English | 13uG.00 | Main spoken language Burmese | 96559 |
| Probable | First/main language not English | 13uT.00 | Main spoken language Finnish | 96560 |
| Probable | First/main language not English | 13us.00 | Main spoken language Macedonian | 96611 |
| Probable | First/main language not English | 13wN.00 | Main spoken language Tongan | 96634 |
| Probable | First/main language not English | 13wT.00 | Main spoken language Uzbek | 96784 |
| Probable | First/main language not English | 13u2.00 | Main spoken language Oromo | 96857 |
| Probable | First/main language not English | 13u4.00 | Main spoken language Afar | 96868 |
| Probable | First/main language not English | 13wa.00 | Main spoken language Zulu | 96873 |
| Probable | First/main language not English | 13uQ.00 | Main spoken language Estonian | 96928 |
| Probable | First/main language not English | 13uk.00 | Main spoken language Kashmiri | 97015 |
| Probable | First/main language not English | 13uz.00 | Main spoken language Mongolian | 97038 |
| Probable | First/main language not English | 13wW.00 | Main spoken language Wolof | 97039 |
| Probable | First/main language not English | 13wQ.00 | Main spoken language Turkmen | 97041 |
| Probable | First/main language not English | 13u9.00 | Main spoken language Azerbaijani | 97083 |
| Probable | First/main language not English | 13wH.00 | Main spoken language Sundanese | 97131 |
| Probable | First/main language not English | 13uX.00 | Main spoken language Georgian | 97212 |
| Probable | First/main language not English | 13wX.00 | Main spoken language Xhosa | 97273 |
| Probable | First/main language not English | 13uc.00 | Main spoken language Indonesian | 97274 |
| Probable | First/main language not English | 13w3.00 | Main spoken language Oriya | 97297 |
| Probable | First/main language not English | 9NUC.11 | Persian language interpreter needed | 97298 |
| Probable | First/main language not English | 13wB.00 | Main spoken language Southern Sotho | 97439 |
| Probable | First/main language not English | 13w6.00 | Main spoken language Romansh | 97440 |
| Probable | First/main language not English | 13uB.00 | Main spoken language Basque | 97574 |
| Probable | First/main language not English | 13ul.00 | Main spoken language Kazakh | 97595 |
| Probable | First/main language not English | 9NUz.00 | Bulgarian language interpreter needed | 97644 |
| Probable | First/main language not English | 13wP.00 | Main spoken language Tsonga | 97685 |
| Probable | First/main language not English | 13uK.00 | Main spoken language Catalan | 97997 |
| Probable | First/main language not English | 9Nmm.00 | Burmese language interpreter needed | 98062 |
| Probable | First/main language not English | 13uZ.00 | Main spoken language Guarani | 98070 |
| Probable | First/main language not English | 13up.00 | Main spoken language Lao | 98132 |
| Probable | First/main language not English | 13um.00 | Main spoken language Kinyarwanda | 98194 |
| Probable | First/main language not English | 13uy.00 | Main spoken language Moldavian | 98215 |
| Probable | First/main language not English | 13uw.00 | Main spoken language Maori | 98255 |
| Probable | First/main language not English | 13w4.00 | Main spoken language Filipino | 98285 |
| Probable | First/main language not English | 13uY.00 | Main spoken language Kalaallisut | 98510 |
| Probable | First/main language not English | 13ub.00 | Main spoken language Icelandic | 98604 |
| Probable | First/main language not English | 13u8.00 | Main spoken language Aymara | 98762 |
| Probable | First/main language not English | 9NmQ.00 | Hungarian language interpreter needed | 98809 |
| Probable | First/main language not English | 9NUy.00 | Romanian language interpreter needed | 98841 |
| Probable | First/main language not English | 13wS.00 | Main spoken language Uighur | 99712 |
| Probable | First/main language not English | 9Nn1.00 | Tsonga language interpreter needed | 99794 |
| Probable | First/main language not English | 13ui.00 | Main spoken language Javanese | 100011 |
| Probable | First/main language not English | 13uL.00 | Main spoken language Slovak | 100013 |
| Probable | First/main language not English | 9NmA.00 | Macedonian language interpreter needed | 100438 |
| Probable | First/main language not English | 13uR.00 | Main spoken language Faeroese | 100707 |
| Probable | First/main language not English | 13uS.00 | Main spoken language Fijian | 100714 |
| Probable | First/main language not English | 13ug.00 | Main spoken language Inuktitut | 100716 |
| Probable | First/main language not English | 13uW.00 | Main spoken language Galician | 100743 |
| Probable | First/main language not English | 9Nn7.00 | Slovenian language interpreter needed | 100759 |
| Probable | First/main language not English | 13uH.00 | Main spoken language Belarusian | 100828 |
| Probable | First/main language not English | 13uD.00 | Main spoken language Bihari | 100949 |
| Probable | First/main language not English | 13wb.00 | Main spoken language Konkani | 101038 |
| Probable | First/main language not English | 13uJ.00 | Main spoken language Central Khmer | 101189 |
| Probable | First/main language not English | 13wA.00 | Main spoken language Dari | 101220 |
| Probable | First/main language not English | 9Nn4.00 | Telugu language interpreter needed | 101614 |
| Probable | First/main language not English | 13ut.00 | Main spoken language Malagasy | 101620 |
| Probable | First/main language not English | 13ud.00 | Main spoken language Interlingua | 101659 |
| Probable | First/main language not English | 13l9.11 | Main spoken language Iban | 101761 |
| Probable | First/main language not English | 13uM.00 | Main spoken language Corsican | 101788 |
| Probable | First/main language not English | 9NUc.11 | Punjabi language interpreter needed | 101814 |
| Probable | First/main language not English | 13uY.11 | Main spoken language Greenlandic | 102007 |
| Probable | First/main language not English | 13uC.00 | Main spoken language Dzongkha | 102127 |
| Probable | First/main language not English | 13uF.00 | Main spoken language Breton | 102128 |
| Probable | First/main language not English | 13ue.00 | Main spoken language Interlingue | 102129 |
| Probable | First/main language not English | 13u3.00 | Main spoken language Abkhazian | 102184 |
| Probable | First/main language not English | 13u7.00 | Main spoken language Assamese | 102218 |
| Probable | First/main language not English | 13uA.00 | Main spoken language Bashkir | 102259 |
| Probable | First/main language not English | 13wC.00 | Main spoken language Tswana | 102877 |
| Probable | First/main language not English | 13uV.00 | Main spoken language Frisian | 103200 |
| Probable | First/main language not English | 13w7.00 | Main spoken language Samoan | 103219 |
| Probable | First/main language not English | 13uq.00 | Main spoken language Bamun | 104071 |
| Probable | First/main language not English | 9NmC.00 | Latvian language interpreter needed | 104635 |
| Probable | First/main language not English | 13wE.00 | Main spoken language Ndebele | 104886 |
| Probable | First/main language not English | 9Nm6.00 | Brawa language interpreter needed | 104901 |
| Probable | First/main language not English | 9Nmd.00 | Catalan language interpreter needed | 105079 |
| Probable | First/main language not English | 13wV.00 | Main spoken language Tetum | 105523 |
| Probable | First/main language not English | 13wc.00 | Main spoken language Aragonese | 105529 |
| Probable | First/main language not English | 13wJ.00 | Main spoken language Tajik | 105960 |
| Probable | First/main language not English | 13Z6900 | First language not English | 108098 |
| Probable | First/main language not English | 9Nn6.00 | Turkmen language interpreter needed | 108184 |
| Probable | First/main language not English | 9NmE.00 | Kinyarwanda language interpreter needed | 109489 |
| Probable | First/main language not English | 13l6.11 | Main spoken language Gujarati | 109896 |
| Probable | First/main language not English | 13wF.00 | Main spoken language Swati | 111709 |
| Probable | First/main language not English | 13w0.00 | Main spoken language Nauru | 111734 |
| Probable | First/main language not English | 9Nm1.00 | Moldavian language interpreter needed | 111788 |
| Probable | First/main language not English | 13wZ.00 | Main spoken language Zhuang | 111789 |
| Probable | First/main language not English | 13wY.00 | Main spoken language Yiddish | 111874 |
| Probable | First/main language not English | 13w8.00 | Main spoken language Sango | 111919 |
| Probable | First/main language not English | 9NnC.00 | Sundanese language interpreter needed | 112222 |
| Probable | First/main language not English | 13uo.00 | Main spoken language Rundi | 112260 |
| Probable | First/main language not English | 13wK.00 | Main spoken language Tatar | 112321 |
| Probable | First/main language not English | 13lD.00 | Main spoken language Portuguese | 32728 |
| Possible | Non-UK origin | 1343 | Asian origin | 25801 |
| Possible | Non-UK origin | 1345 | South American origin | 32101 |
| Possible | Non-UK origin | 2263.11 | O/E - Asian origin | 32132 |
| Possible | Non-UK origin | 1344 | North American origin | 41150 |
| Possible | Non-UK origin | 1342 | African origin | 45125 |
| Possible | Non-UK origin | 134A.00 | West Indian origin | 45131 |
| Possible | Non-UK origin | 1347 | Indian origin | 45144 |
| Possible | Non-UK origin | 1348 | Middle Eastern origin | 47951 |
| Possible | Non-UK origin | 9SA5.00 | Other African countries (NMO) | 47969 |
| Possible | Non-UK origin | 1346 | Australian origin | 47975 |
| Possible | Non-UK origin | 2263 | O/E - Mongoloid origin | 66536 |
|  |  |  |  |  |

#

# Table S3. Number and percentage of recorded migrants in CPRD GOLD per year by certainty of migration status (1997-2018)

| **Year** | **Migrants** | | **Definite migrants** | | **Probable migrants** | | **Possible migrants** | | **Definite + Probable migrants** | |
| --- | --- | --- | --- | --- | --- | --- | --- | --- | --- | --- |
|  | **n/N** | **%** | **n/N** | **%** | **n/N** | **%** | **n/N** | **%** | **n/N** | **%** |
| **Total** | 403,768/16,071,111 | 2·51 | 178,749/16,071,111 | 1·11 | 216,731/16,071,111 | 1·35 | 8,288/16,071,111 | 0·05 | 395,480/16,071,111 | 2·46 |
| **1997** | 4,417/2,210,551 | 0·20 | 772/2,210,551 | 0·0349 | 3,392/2,210,551 | 0·153 | 253/2,210,551 | 0·0114 | 4,164/2,210,551 | 0·00188 |
| **1998** | 6924/2,662,706 | 0·26 | 1,949/2,662,706 | 0·0732 | 4,604/2,662,706 | 0·173 | 371/2,662,706 | 0·0139 | 6,553/2,662,706 | 0·246 |
| **1999** | 9329/3,281,113 | 0·28 | 2,955/3,281,113 | 0·0901 | 5,934/3,281,113 | 0·181 | 440/3,281,113 | 0·0134 | 8,889/3,281,113 | 0·271 |
| **2000** | 12,291/3,787,586 | 0·33 | 4,197/3,787,586 | 0·111 | 7,555/3,787,586 | 0·199 | 539/3,787,586 | 0·0142 | 11,752/3,787,586 | 0·310 |
| **2001** | 17,176/4,362,237 | 0·39 | 6,393/4,362,237 | 0·158 | 9,461/4,362,237 | 0·217 | 822/4,362,237 | 0·0188 | 16,354/4,362,237 | 0·375 |
| **2002** | 23,638/4,812,744 | 0·49 | 10,911/4,812,744 | 0·227 | 11,742/4,812,744 | 0·244 | 985/4,812,744 | 0·0205 | 22,653/4,812,744 | 0·471 |
| **2003** | 31,637/5,194,514 | 0·609 | 16,372/5,194,514 | 0·315 | 14,132/5,194,514 | 0·272 | 1,133/5,194,514 | 0·0218 | 30,504/5,194,514 | 0·587 |
| **2004** | 42,869/5,435,276 | 0·79 | 23,824/5,435,276 | 0·438 | 17,679/5,435,276 | 0·325 | 1,366/5,435,276 | 0·0251 | 41,503/5,435,276 | 0·764 |
| **2005** | 53,229/5,534,090 | 0·96 | 29,208/5,534,090 | 0·528 | 22,357/5,534,090 | 0·404 | 1,664/5,534,090 | 0·0301 | 51,565/5,534,090 | 0·932 |
| **2006** | 63,387/5,653,376 | 1·12 | 22,431/5,653,376 | 0·591 | 27,654/5,653,376 | 0·489 | 2,302/5,653,376 | 0·0407 | 61,085/5,653,376 | 1·08 |
| **2007** | 71,423/5,716,075 | 1·25 | 34,474/5,716,075 | 0·603 | 34,50/5,716,075 | 0·604 | 2,440/5,716,075 | 0·0427 | 68,983/5,716,075 | 1·21 |
| **2008** | 83,092/5,682,548 | 1·46 | 38,150/5,682,548 | 0·671 | 42,415/5,682,548 | 0·746 | 2,527/5,682,548 | 0·0445 | 80,565/5,682,548 | 1·42 |
| **2009** | 102,292/5,700,405 | 1·79 | 41,733/5,700,405 | 0·732 | 58,246/5,700,405 | 1·02 | 2,313/5,700,405 | 0·0406 | 99,979/5,700,405 | 1·75 |
| **2010** | 121,683/5,694,007 | 2·14 | 45,192/5,694,007 | 0·794 | 74,034/5,694,007 | 1·30 | 2,457/5,694,007 | 0·0432 | 119,226/5,694,007 | 2·09 |
| **2011** | 137,231/5,583,145 | 2·46 | 46,943/5,583,145 | 0·841 | 87,862/5,583,145 | 1·57 | 2,426/5,583,145 | 0·0435 | 134,805/5,583,145 | 2·41 |
| **2012** | 155,439/5,490,938 | 2·83 | 50,303/5,490,938 | 0·916 | 102,603/5,490,938 | 1·87 | 2,533/5,490,938 | 0·0461 | 152,906/5,490,938 | 2·78 |
| **2013** | 165,392/5,427,745 | 3·05 | 56,225/5,427,745 | 1·04 | 106,300/5,427,745 | 1·96 | 2,867/5,427,745 | 0·0528 | 162,525/5,427,745 | 2·99 |
| **2014** | 151,699/5,094,287 | 2·98 | 58,425/5,094,287 | 1·15 | 90,520/5,094,287 | 1·78 | 2,754/5,094,287 | 0·0541 | 148,945/5,094,287 | 2·92 |
| **2015** | 139,348/4,484,174 | 3·11 | 55,934/4,484,174 | 1·25 | 81,960/4,484,174 | 1·83 | 1,454/4,484,174 | 0·0324 | 137,894/4,484,174 | 3·08 |
| **2016** | 106,614/3,600,079 | 2·96 | 39,106/3,600,079 | 1·09 | 66,553/3,600,079 | 1·85 | 955/3,600,079 | 0·0265 | 105,659/3,600,079 | 2·93 |
| **2017** | 94,293/3,075,162 | 3·07 | 29,888/3,075,162 | 0·972 | 63,474/3,075,162 | 2·06 | 931/3,075,162 | 0·0303 | 93,362/3,075,162 | 3·04 |
| **2018** | 100,626/2,761,397 | 3·64 | 38,096/2,761,397 | 1·38 | 61,688/2,761,397 | 2·23 | 842/2,761,397 | 0·0305 | 99,784/2,761,397 | 3·61 |

#### **Table S4. Demographic characteristics of recorded migrants in CPRD GOLD at the time of the 2011 census by certainty of migration status (England and Wales)**

| **Demographic characteristic** | | **Migrants (%)** | **Definite migrants (%)** | **Probable migrants (%)** | **Possible migrants (%)** | **Definite + Probable migrants (%)** |
| --- | --- | --- | --- | --- | --- | --- |
| **Total** |  | 107,526 (100%) | 36,471 (33·9%)* | 68,983 (64·2%) | 2,072 (1·92%) | 105,454 (98·1%) |
|  |  |  |  |  |  |  |
| **Sex** | Male | 51,252 (47·7%) | 17,894 (49·1%) | 32,325 (46·9%) | 1,033 (49·9%) | 50,219 (47·6%) |
|  | Female | 56,274 (52·3%) | 18,577 (50·9%) | 36,658 (53·1%) | 1,039 (50·1%) | 55,235 (52·4%) |
|  |  |  |  |  |  |  |
| **Year of birth** | 1900-1919 | 119 (0·11%) | 36 (0·10%) | 77 (0·112%) | 6 (0·290%) | 113 (0·107%) |
|  | 1920-1939 | 4,560 (4·24%) | 1,230 (3·37%) | 3,235 (4·69%) | 95 (4·58%) | 4,465 (4·23%) |
|  | 1940-1959 | 13,267 (12·3%) | 4,332 (11·9%) | 8,616 (12·5%) | 319 (15·4%) | 12,948 (12·3%) |
|  | 1960-1979 | 39,600 (36·8%) | 15,977 (43·8%) | 22,722 (32·9%) | 901 (43·5%) | 38,699 (36·7%) |
|  | 1980-1999 | 35,886 (33·4%) | 12,414 (34·0%) | 22,875 (33·2%) | 597 (28·8%) | 35,289 (33·5%) |
|  | 2000-2018 | 14,094 (13·1%) | 2,482 (6·81%) | 11,458 (16·6%) | 154 (7·43%) | 13,940 (13·2%) |
|  |  |  |  |  |  |  |
| **Ethnicity** | White British | 1,667 (1·55%) | 840 (2·30%) | 796 (1·15%) | 31 (1·50%) | 1,636 (1·55%) |
|  | White Non-British | 34,821 (32·4%) | 11,568 (31·7%) | 23,168 (33·6%) | 85 (4·10%) | 34,736 (32·9%) |
|  | Mixed | 2,494 (2·32%) | 1,057 (2·90%) | 1,367 (1·98%) | 70 (3·38%) | 2,424 (2·30%) |
|  | Asian/Asian British | 39,845 (37·1%) | 8,419 (23·1%) | 30,606 (44·4%) | 820 (39·6%) | 39,025 (37·0%) |
|  | Black/African/Caribbean/Black British | 10,859 (10·1%) | 5,782 (15·9%) | 4,563 (6·64%) | 514 (24·8%) | 10,345 (9·81%) |
|  | Other | 8,632 (8·03%) | 3,130 (8·58%) | 5,371 (7·82%) | 131 (6·32%) | 8,501 (8·06%) |
|  | Unknown | 9,208 (8·56%) | 5,675 (15·6%) | 3,112 (4·51%) | 421 (20·3%) | 8,787 (8·33%) |
|  | | | | | | |
| **Geographical region of birth (WHO Region)** | African Region | 5,617 (5·22%) | 5,617 (15·4%) | ·· | ·· | ·· |
| European Region | 10,126 (9·42%) | 10,126 (27·8%) | ·· | ·· | ·· |
| Eastern Mediterranean Region | 2,970 (2·76%) | 2,970 (8·14%) | ·· | ·· | ·· |
| Region of the Americas | 2,229 (2·07%) | 2,229 (6·11%) | ·· | ·· | ·· |
| South East Asian Region | 4,088 (3·80%) | 4,088 (11·2%) | ·· | ·· | ·· |
| Western Pacific Region | 3,622 (3·37%) | 3,622 (9·93%) | ·· | ·· | ·· |
| Unknown | 78,742 (73·2%) | 7,819 (21·4%) | ·· | ·· | ·· |
|  | | | | | | |
| **Geographical region of birth (continent)** | Africa | 5,617 (5·22%) | 5,617 (15·4%) | ·· | ·· | ·· |
| Europe | 10,048 (9·34%) | 10,048 (27·6%) | ·· | ·· | ·· |
| Middle East & Asia | 10,022 (9·32%) | 10,022 (27·5%) | ·· | ·· | ·· |
| The Americas & Caribbean | 2,229 (2·07%) | 2,229 (6·11%) | ·· | ·· | ·· |
|  | Antarctica & Oceania | 845 (0·79%) | 845 (2·3%) | ·· | ·· | ·· |
|  | Unknown | 78,737 (73·2%) | 7,710 (21·1%) | ·· | ·· | ·· |
|  |  |  |  |  |  |  |
| **Practice region** | London | 46,043 (42·8%) | 21,324 (58·5%) | 25,301 (34·1%) | 1,218 (58·8%) | 44,825 (42·5%) |
|  | South Central | 10,641(9·90%) | 3,866 (10·6%) | 6,566 (9·56%) | 209 (10·1%) | 10,432 (9·89%) |
|  | South East Coast | 6,615 (6·15%) | 1,483 (4·06%) | 5,042 (7·31%) | 90 (4·34%) | 6,525 (6·19%) |
|  | North West | 11,538 (10·7%) | 3,197 (8·77%) | 8,258 (12·0%) | 83 (4·01%) | 11,455 (10·9%) |
|  | West Midlands | 10,647 (9·93%) | 1,190 (3·26%) | 9,347 (13·5%) | 110 (5·31%) | 10,537 (10·0%) |
|  | East of England | 8,584 (7·98%) | 1,445 (3·96%) | 7,069 (10·2%) | 70 (3·38%) | 8,514 (8·07%) |
|  | South West | 6,039 (5·62%) | 2,299 (6·30%) | 3,709 (5·40%) | 31 (1·50%) | 6,008 (5·70%) |
|  | North East | 2,370 (2·20%) | 154 (0·422%) | 2,209 (3·20%) | 7 (0·338%) | 2,363 (2·24%) |
|  | East Midlands | 1,770 (1·65%) | 150 (0·422%) | 1,541 (2·24%) | 79 (3·81%) | 1,691 (1·60%) |
|  | Yorkshire & The Humber | 760 (0·707%) | 101 (0·277%) | 574 (0·83%) | 85 (4·10%) | 675 (0·64%) |
|  | Wales | 2,519 (2·34%) | 1,262 (3·46%) | 1,167 (1·70%) | 90 (4·34%) | 2,429 (2·30%) |

####

*Percentages are calculated across columns except for the first row which are percentages

#

#### **Table S5. Migrants as a percentage of all patients registered in a CPRD GOLD practice region (2009-2018)**

| **Practice region** | **No. recorded migrants** | **No. registered patients** | **Percentage migrants in region** |
| --- | --- | --- | --- |
| North East | 4,980 | 205,916 | 2·42 |
| North West | 31,964 | 1,534,366 | 2·08 |
| Yorkshire & The Humber | 1,740 | 483,845 | 0·36 |
| East Midlands | 4,594 | 492,978 | 0·93 |
| West Midlands | 29,629 | 1,280,599 | 2·31 |
| East of England | 24,006 | 1,319,786 | 1·82 |
| South West | 19,734 | 1,322,423 | 1·49 |
| South Central | 48,740 | 1,674,896 | 2·91 |
| London | 171,368 | 2,302,173 | 7·44 |
| South East Coast | 43,089 | 1,625,941 | 2·65 |
| Northern Ireland | 921 | 434,498 | 0·21 |
| Scotland | 12,135 | 1,762,543 | 0·69 |
| Wales | 10,868 | 1,631,147 | 0·67 |
|  |  |  |  |

####

####

#### **Table S6. Percentage of individuals recorded as migrants in CPRD GOLD and ONS country of birth (2004-2018)**

| **Year** | **Percentage of CPRD GOLD patients recorded as international migrants (95% CI)** | **Percentage of individuals living in the UK recorded by ONS as international migrants** | **Ratio of total percentages**  **(% CPRD / % ONS )** |
| --- | --- | --- | --- |
| 2004 | 0·79 (0·781 - 0·796) | 8·89 | 0·09 |
| 2005 | 0·96 (0·954 - 0·970) | 9·36 | 0·10 |
| 2006 | 1·12 (1·113 - 1·130) | 10·05 | 0·11 |
| 2007 | 1·25 (1·240 - 1·259) | 10·59 | 0·12 |
| 2008 | 1·46 (1·452 - 1·472) | 11·09 | 0·13 |
| 2009 | 1·79 (1·784 - 1·805) | 11·42 | 0·16 |
| 2010 | 2·14 (2·125 - 2·149) | 11·68 | 0·18 |
| 2011 | 2·46 (2·445 - 2·471) | 12·26 | 0·20 |
| 2012 | 2·83 (2·817 - 2·845) | 12·44 | 0·23 |
| 2013 | 3·05 (3·033 - 3·062) | 12·52 | 0·24 |
| 2014 | 2·98 (2·963 - 2·993) | 13·00 | 0·23 |
| 2015 | 3·11 (3·092 - 3·124) | 13·33 | 0·23 |
| 2016 | 2·96 (2·944 - 2·979) | 14·14 | 0·21 |
| 2017 | 3·07 (3·047 - 3·086) | 14·39 | 0·21 |
| 2018 | 3·64 (3·622 - 3·666) | 14·24 | 0·26 |

#

####

#### **Table S7. Percentage of CPRD patients recorded as migrants and ONS 2011 census percentage of migrants in the population by age band (2011).**

| **Age band in years** | **CPRD GOLD**  **migrants / all individuals (%)** | **ONS 2011 census**  **migrants / all individuals (%)** | **Ratio of total percentages**  **(% CPRD / % ONS )** |
| --- | --- | --- | --- |
|
| **0-15** | 17,838 / 745,500 (2·4%) | 594,415 / 10,579,132 (5·6%) | 0·43 |
| **16-24** | 11,129 / 446,584 (2·5%) | 896,719 / 6,658,636 (13·5%) | 0·18 |
| **25-34** | 30,178 / 552,426 (5·5%) | 1,892,699 / 7,520,524 (25·2%) | 0·22 |
| **35-49** | 28,135 / 941,841 (3·0%) | 2,004,537 / 11,931,776 (16·8%) | 0·18 |
| **50-64** | 12,586 / 810,017 (1·6%) | 1,239,056 /10,162,771 (12·2%) | 0·13 |
| **65-74** | 4,194 / 397,473 (1·1%) | 479,211 / 4,852,833 (9·9%) | 0·11 |
| **75-84** | 2,684 / 256,482 (1·1%) | 300,122 / 3,115,552 (9·6%) | 0·11 |
| **85 plus** | 782 /118,357 (0·7%) | 98,251 / 1,254,688 (7·8%) | 0·09 |

####

####

#### **Table S8. Age breakdown of migrants in CPRD GOLD and in ONS at the time of the 2011 census**

| **Age band in years** | **CPRD GOLD** | | **ONS 2011 census** | |
| --- | --- | --- | --- | --- |
|
| **No. migrants** | **% of migrants** | **No. migrants** | **% of migrants** |
| **All age bands** | 107,526 | 100 | 7,505,010 | 100 |
| **0-15** | 17,838 | 16·6 | 594,415 | 7·92 |
| **16-24** | 11,129 | 10·4 | 896,719 | 12·0 |
| **25-34** | 30,178 | 28·07 | 1,892,699 | 25·2 |
| **35-49** | 28,135 | 26·2 | 2,004,537 | 26·7 |
| **50-64** | 12,586 | 11·7 | 1,239,056 | 16·5 |
| **65-74** | 4,194 | 3·90 | 479,211 | 6·39 |
| **75-84** | 2,684 | 2·50 | 300,122 | 4·00 |
| **85 plus** | 782 | 0·73 | 98,251 | 1·31 |

###

####

#### **Table S9. Breakdown of migrants recorded in CPRD GOLD at the time of the ONS 2011 census by the 18 group classification of ethnicity (2011)**

|  |  |  |
| --- | --- | --- |
| **Ethnic group** | **Number of migrants** | **% of migrants** |
|  |  |  |
| All migrants | 107,526 | 100 |
| White British | 1,667 | 1·55 |
| White Irish | 551 | 0·51 |
| White Other | 28,605 | 26·6 |
| White NOS | 5,665 | 5·27 |
| Mixed White and Black | 765 | 0·71 |
| Mixed White and Asian | 474 | 0·44 |
| Mixed Asian and Black | 141 | 0·13 |
| Mixed Other | 1,056 | 0·98 |
| Mixed NOS | 58 | 0·05 |
| Indian | 13,283 | 12·4 |
| Pakistani | 10,084 | 9·38 |
| Bangladeshi | 3,935 | 3·66 |
| Other Asian | 10,028 | 9·33 |
| Black Caribbean | 1,158 | 1·08 |
| Black African | 8,582 | 7·98 |
| Black Other | 1,119 | 1·04 |
| Chinese | 2,515 | 2·34 |
| Other ethnic group | 8,632 | 8·03 |
| Unknown | 9,208 | 8·56 |
